# Supplementary material
Source: PubMed Central journal article supplement (PMC2943428)
Supplement: NIHMS67541-supplement-01.pdf [file NIHMS67541-supplement-01.pdf]

## Supplemental Data

### T Cell-Specific siRNA Delivery

### Suppresses HIV-1 Infection

### in Humanized Mice

Priti Kumar, Hong-Seok Ban, Sang-Soo Kim, Haoquan Wu, Todd Pearson, Dale L. Greiner, Amale Laouar, Jiahong Yao, Viraga Haridas, Katsuyoshi Habiro, Yong-Guang Yang, Ji-Hoon Jeong, Kuen-Yong Lee, Yong-Hee Kim, Sung Wan Kim, Matthias Peipp, Georg H. Fey, Manjunath N, Leonard D. Shultz, Sang-Kyung Lee, and Premalata Shankar

**Table S1.**

|                  |                                                 |
|------------------|-------------------------------------------------|
| mir-16           | 5'- TAGCAGCACGTAAATATTGGC -3'                   |
| mir-150          | 5'-TCTCCCAACCCTTGACCAG -3'                      |
| mir-142-3p       | 5'- GTAGTGTTTCCTACTTTATG -3'                    |
| mir-181a         | 5'- AACATTCAACGCTGTCGGTG -3'                    |
| U6B              | 5'- ATGACACGCAAATTCGTGAAGC -3'                  |
| Reverse primer   | 5'- GCGAGCACAGAATTAATACGAC -3'                  |
| miR RT oligo dT  | 5'- GCGAGCACAGAATTAATACGACTCACTATAGGT(20)VN -3' |
| HuCCR5 (forward) | 5'- GGCAGGGCTCCGATGTATAA -3'                    |
| HuCCR5 (reverse) | 5'- CATCCGTTCCCCTACAAGAA -3'                    |
